# Supplementary material for: JAK3 Variant, Immune Signatures, DNA Methylation, and Social Determinants Linked to Survival Racial Disparities in Head and Neck Cancer Patients
Source: Oxford University Press journal article supplement (doi:10.1158/1940-6207.capr-17-0356), 2019-02-18
Supplement: 19406207capr170356-sup-191914_2_supp_5218042_pjlfgb.xlsx [file 19406207capr170356-sup-191914_2_supp_5218042_pjlfgb.xlsx]

## Sheet: Sheet1
Supplementary Table 1. Differences in the frequency of somatic mutations observed in Non-Latino Whites and African American HNSCC patients.
		All HNSCC sites		Oropharynx		Non-Oropharynx
	Genes	Non-Latino Whites	Black	Non-Latino Whites	Black	Non-Latino Whites	Black
Somatic Mutations	TP53	0.39	0.5	0.24	0.33	0.48	0.6
	NOTCH1	0.16	0.25	0.14	0.67	0.18	0
	CDKN2A	0.13	0	0.05	0	0.18	0
	FBXW7	0.07	0.13	0.1	0	0.05	0.2
	HRAS	0.03	0	0.05	0	0.03	0
Promoter Methylation	PAX1	0.65	0.63	0.52	0.67	0.7	0.6
	PAX5	0.8	0.86	0.86	0.67	0.73	0.8
	ZIC4	0.79	0.75	0.95	0.33	0.7	1
	PLCB1	0.51	0.5	0.52	0.33	0.5	0.6
Mut & Met	TP53 and PAX5	0.29	0.59	0.14	0.33	0.35	0.6
	NOTCH1 and PAX1	0.1	0.13	0.1	0.33	0.1	0
Mut or Met	TP53 or PAX5	0.89	0.75	0.9	0.67	0.83	0.8
	NOTCH1 or PAX1	0.7	0.75	0.57	1	0.78	0.6
