# Supplementary material for: JAK3 Variant, Immune Signatures, DNA Methylation, and Social Determinants Linked to Survival Racial Disparities in Head and Neck Cancer Patients
Source: Oxford University Press journal article supplement (doi:10.1158/1940-6207.capr-17-0356), 2019-02-18
Supplement: 19406207capr170356-sup-191914_2_supp_5218043_pjlfgb.xlsx [file 19406207capr170356-sup-191914_2_supp_5218043_pjlfgb.xlsx]

## Sheet: Sheet1
Supplementary Table 2. Frequency of somatic mutations in Black head and neck cancer patients
	All HNSCC sites		Oral Cavity		Larynx		Oropharynx
Genes	Number	Frequency	Number	Frequency	Number	Frequency	Number	Frequency
TP53	13	0.625	2	0.125	8	0.375	3	0.1875
PIK3CA	4	0.25	0	0	4	0.25	0	0
JAK3	4	0.25	0	0	4	0.25	0	0
KDR	2	0.125	0	0	1	0.0625	1	0.0625
KIT	2	0.125	0	0	2	0.125	0	0
NOTCH1	2	0.125	0	0	0	0	2	0.125
CDKN2A	1	0.0625	1	0.0625	0	0	0	0
APC	1	0.0625	0	0	1	0.0625	0	0
MET	1	0.0625	0	0	1	0.0625	0	0
