# Supplementary material for: JAK3 Variant, Immune Signatures, DNA Methylation, and Social Determinants Linked to Survival Racial Disparities in Head and Neck Cancer Patients
Source: Oxford University Press journal article supplement (doi:10.1158/1940-6207.capr-17-0356), 2019-02-18
Supplement: 19406207capr170356-sup-191914_2_supp_5218044_pjlfgb.xlsx [file 19406207capr170356-sup-191914_2_supp_5218044_pjlfgb.xlsx]

## Sheet: Sheet2
Supplementary Table 3. Top altered pathways revealed by Gene Ontology (GO) clustering
Category	Term	P Value	Genes
GOTERM_BP_FAT	GO:0042110-T cell activation	0.002	IRF4, PAX1, CXCL12
GOTERM_BP_FAT	GO:0046649-lymphocyte activation	0.006	IRF4, PAX1, CXCL12
GOTERM_BP_FAT	GO:0045321-leukocyte activation	0.008	IRF4, PAX1, CXCL12
GOTERM_BP_FAT	GO:0001775-cell activation	0.012	IRF4, PAX1, CXCL12
INTERPRO	IPR011991: DNA-binding	0.0001	IRF8, PAX5, IRF4, PAX1
SP_PIR_KEYWORDS	Transcription regulation	0.001	PARP15, IRF8, EBF1, PAX5, IRF4, PAX1
