# Supplementary material for: JAK3 Variant, Immune Signatures, DNA Methylation, and Social Determinants Linked to Survival Racial Disparities in Head and Neck Cancer Patients
Source: Oxford University Press journal article supplement (doi:10.1158/1940-6207.capr-17-0356), 2019-02-18
Supplement: 19406207capr170356-sup-191914_2_supp_5218045_pjlfgb.xlsx [file 19406207capr170356-sup-191914_2_supp_5218045_pjlfgb.xlsx]

## Sheet: Sheet1
Supplementary Table 4.
Univariate
	HR	95% CI		P
Age (continuous)	1.02	(1.01 - 1.04)		0.007
Anatomic subdivision (hypopharynx/larynx)	1.06	(0.70 - 1.61)		0.772
T stage (T3-T4)	1.08	(0.72 - 1.63)		0.712
N stage (N+)	0.96	(0.64 - 1.44)		0.846
Grade (G3-G4)	0.82	(0.54 - 1.26)		0.374
Gender (female)	1.27	(0.86 - 1.88)		0.226
Race (non-white)	1.22	(0.67 - 2.23)		0.514
Alcohol (>15 consumptions/week)	1.28	(0.67 - 2.45)		0.46
Smoking (current or previous)	1.84	(1.06 - 3.18)		0.029
Surgical margin (close/positive)	1.77	(1.11 - 2.83)		0.017
HPV (positive)	0.37	(0.18 - 0.77)		0.007
P53 (mutation present)	2.49	(1.55 - 4.01)		<0.001
Pax5 (methylated)	1.6	(1.06 - 2.43)		0.027
Pax1 (methylated)	0.64	(0.32 - 1.27)		0.197
Pax9 (methylated)	0.67	(0.45 - 0.99)		0.049
Notch1 (mutation present)	0.88	(0.56 - 1.39)		0.58
Pax5 methylated and p53 mutated	2.36	(1.62 - 3.45)		<0.001
Mutivariate
	HR	95% CI		P
Smoking (current or previous)	1.88	(1.07 - 3.32)		0.029
Surgical margin (close/positive)	1.76	(1.07 - 2.87)		0.024
P53 (mutation present)1	2.06	(1.25 - 3.38)		0.004
Pax5 (methylated)2	1.63	(1.04 - 2.56)		0.033
Mutivariate
	HR	95% CI		P
Smoking (current or previous)	1.88	(1.06 - 3.31)		0.03
Surgical margin (close/positive)	1.77	(1.09 - 2.90)		0.021
Pax5 methylated and p53 mutated3	2.16	(1.44 - 3.24)		<0.001
1. Adjusted for smoking, surgical margin, and Pax5.
2. Adjusted for smoking, surgical margin, and P53.
3. Adjusted for smoking and surgical margin.
